# Supplementary material for: Planting density is a key driver of sorghum yield gaps and variability in smallholder farms of northern Nigeria: Results of an integrated panel survey and crop cutting experiment
Source: Research Square preprint supplement (doi:10.21203/rs.3.rs-2243636/v1), 2022-11-09
Supplement: Supplementary file 1 [file e85a4c410e8ac8872b2b267a.docx]

Supplementary Table 1: Eigenvalues and Percentage Variance Explained by Five Principal Components (PC’s)

| PC | Eigenvalue | Variance (%) | Cumulative Variance (%) |
| --- | --- | --- | --- |
| 1 | 3.95 | 13.16 | 13.16 |
| 2 | 3.20 | 10.67 | 23.83 |
| 3 | 2.54 | 8.47 | 32.29 |
| 4 | 2.33 | 7.76 | 40.05 |
| 5 | 1.73 | 5.75 | 45.80 |
| 6 | 1.58 | 5.26 | 51.06 |
| 7 | 1.46 | 4.85 | 55.91 |
| 8 | 1.33 | 4.43 | 60.34 |


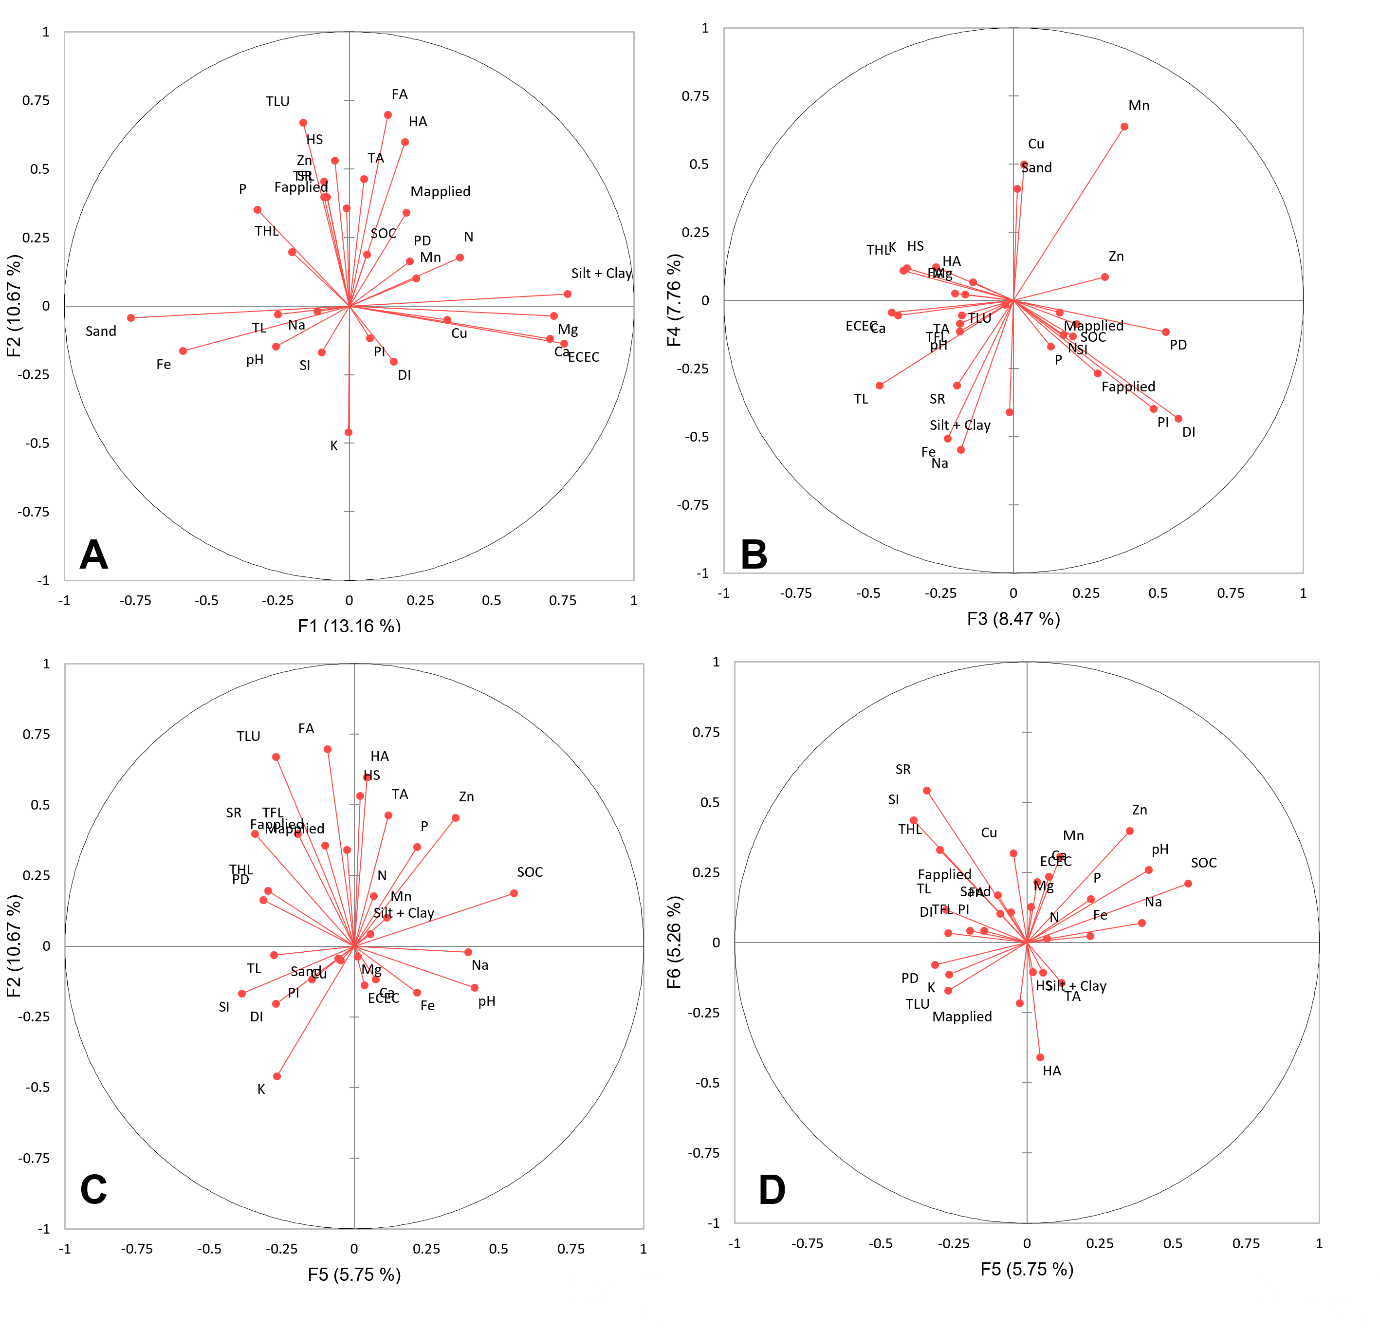


Supplementary Figure 2: 2A-1D shows the contribution and directions of socio-economic and biophysical variables in the first six components resulting from principal component analysis.
